# Supplementary material for: Self-sampling for human papillomavirus (HPV) testing: a systematic review and meta-analysis
Source: PubMed Central journal article supplement — BMJ Glob Health. 2019 May 14;4(3):e001351. doi: 10.1136/bmjgh-2018-001351 (PMC6529022; doi:10.1136/bmjgh-2018-001351), 2019-05-14
Supplement: bmjgh-2018-001351supp002.pdf [file bmjgh-2018-001351supp002.pdf]

Question: HPV self-sampling compared to clinician-based sampling and cervical cancer screening services for women aged 30-60

| Certainty assessment |              |              |               |              |             |                      | No of patients    |                                                                 | Effect            |                   | Certainty | Importance |
|----------------------|--------------|--------------|---------------|--------------|-------------|----------------------|-------------------|-----------------------------------------------------------------|-------------------|-------------------|-----------|------------|
| No of studies        | Study design | Risk of bias | Inconsistency | Indirectness | Imprecision | Other considerations | HPV self-sampling | clinician-based sampling and cervical cancer screening services | Relative (95% CI) | Absolute (95% CI) |           |            |

Uptake of cervical cancer screening services - RCTs - overall

|                                                                                             |                   |                          |                          |             |             |      |                      |                      |                           |                                                |              |  |
|---------------------------------------------------------------------------------------------|-------------------|--------------------------|--------------------------|-------------|-------------|------|----------------------|----------------------|---------------------------|------------------------------------------------|--------------|--|
| 29 <sup>1,2,3,4,5,6,7,8,9,10,11,12,13,14,15,16,17,18,19,20,21,22,23,24,25,26,27,28,29</sup> | randomised trials | not serious <sup>a</sup> | not serious <sup>b</sup> | not serious | not serious | none | 64852/182305 (35.6%) | 36318/100557 (36.1%) | RR 2.130 (1.891 to 2.399) | 408 more per 1,000 (from 322 more to 505 more) | ⊕⊕⊕⊕<br>HIGH |  |
|---------------------------------------------------------------------------------------------|-------------------|--------------------------|--------------------------|-------------|-------------|------|----------------------|----------------------|---------------------------|------------------------------------------------|--------------|--|

Uptake of cervical cancer screening - RCTs - kit directly mailed home

|                                                                            |                   |                          |                      |             |             |      |                      |                     |                           |                                                |                  |  |
|----------------------------------------------------------------------------|-------------------|--------------------------|----------------------|-------------|-------------|------|----------------------|---------------------|---------------------------|------------------------------------------------|------------------|--|
| 23 <sup>1,2,3,4,5,6,7,9,10,13,15,16,17,18,19,20,21,22,23,25,26,27,29</sup> | randomised trials | not serious <sup>a</sup> | serious <sup>b</sup> | not serious | not serious | none | 44381/137436 (32.3%) | 24469/84728 (28.9%) | RR 2.265 (1.892 to 2.710) | 365 more per 1,000 (from 258 more to 494 more) | ⊕⊕⊕○<br>MODERATE |  |
|----------------------------------------------------------------------------|-------------------|--------------------------|----------------------|-------------|-------------|------|----------------------|---------------------|---------------------------|------------------------------------------------|------------------|--|

Uptake of cervical cancer screening - RCTs - kit offered door to door by health worker

|                            |                   |                          |                      |             |             |      |                     |                     |                           |                                                   |                  |  |
|----------------------------|-------------------|--------------------------|----------------------|-------------|-------------|------|---------------------|---------------------|---------------------------|---------------------------------------------------|------------------|--|
| 5 <sup>8,15,16,21,22</sup> | randomised trials | not serious <sup>a</sup> | serious <sup>b</sup> | not serious | not serious | none | 12249/12909 (94.9%) | 11837/15798 (74.9%) | RR 2.372 (1.119 to 5.029) | 1,000 more per 1,000 (from 89 more to 1,000 more) | ⊕⊕⊕○<br>MODERATE |  |
|----------------------------|-------------------|--------------------------|----------------------|-------------|-------------|------|---------------------|---------------------|---------------------------|---------------------------------------------------|------------------|--|

Uptake of cervical cancer screening - RCTs - kit on demand

|                            |                   |                          |                      |             |             |      |                    |                    |                           |                                               |                  |  |
|----------------------------|-------------------|--------------------------|----------------------|-------------|-------------|------|--------------------|--------------------|---------------------------|-----------------------------------------------|------------------|--|
| 5 <sup>8,11,14,24,28</sup> | randomised trials | not serious <sup>a</sup> | serious <sup>b</sup> | not serious | not serious | none | 8200/31897 (25.7%) | 2700/20339 (13.3%) | RR 1.280 (0.902 to 1.817) | 37 more per 1,000 (from 13 fewer to 108 more) | ⊕⊕⊕○<br>MODERATE |  |
|----------------------------|-------------------|--------------------------|----------------------|-------------|-------------|------|--------------------|--------------------|---------------------------|-----------------------------------------------|------------------|--|

Uptake of cervical cancer screening - RCTs - self-sample in clinic

|                 |                   |                          |                          |             |                      |                                                  |               |               |                           |                                                 |             |  |
|-----------------|-------------------|--------------------------|--------------------------|-------------|----------------------|--------------------------------------------------|---------------|---------------|---------------------------|-------------------------------------------------|-------------|--|
| 1 <sup>12</sup> | randomised trials | not serious <sup>a</sup> | not serious <sup>c</sup> | not serious | serious <sup>d</sup> | publication bias strongly suspected <sup>e</sup> | 22/63 (34.9%) | 12/31 (38.7%) | RR 0.928 (0.509 to 1.690) | 28 fewer per 1,000 (from 190 fewer to 267 more) | ⊕⊕○○<br>LOW |  |
|-----------------|-------------------|--------------------------|--------------------------|-------------|----------------------|--------------------------------------------------|---------------|---------------|---------------------------|-------------------------------------------------|-------------|--|

Uptake of cervical cancer screening - RCTs - high income countries

| Certainty assessment                                                       |                   |                          |                      |              |             |                      | № of patients           |                                                                 | Effect                       |                                                   | Certainty                                                                                       | Importance |
|----------------------------------------------------------------------------|-------------------|--------------------------|----------------------|--------------|-------------|----------------------|-------------------------|-----------------------------------------------------------------|------------------------------|---------------------------------------------------|-------------------------------------------------------------------------------------------------|------------|
| № of studies                                                               | Study design      | Risk of bias             | Inconsistency        | Indirectness | Imprecision | Other considerations | HPV self-sampling       | clinician-based sampling and cervical cancer screening services | Relative (95% CI)            | Absolute (95% CI)                                 |                                                                                                 |            |
| 26<br>1,2,3,4,5,6,7,8,9,10,12,15,16,17,18,19,20,21,22,23,24,25,26,27,28,29 | randomised trials | not serious <sup>a</sup> | serious <sup>b</sup> | not serious  | not serious | none                 | 55217/172484<br>(32.0%) | 25030/87736<br>(28.5%)                                          | RR 2.244<br>(1.860 to 2.707) | 355 more per 1,000<br>(from 245 more to 487 more) | <br>MODERATE |            |

Uptake of cervical cancer screening - RCTs - low- and middle-income countries

|               |                   |                          |                      |             |             |      |                      |                        |                              |                                                    |                                                                                                 |  |
|---------------|-------------------|--------------------------|----------------------|-------------|-------------|------|----------------------|------------------------|------------------------------|----------------------------------------------------|-------------------------------------------------------------------------------------------------|--|
| 3<br>11,13,14 | randomised trials | not serious <sup>a</sup> | serious <sup>b</sup> | not serious | not serious | none | 9635/9821<br>(98.1%) | 11288/12821<br>(88.0%) | RR 1.539<br>(1.013 to 2.341) | 475 more per 1,000<br>(from 11 more to 1,000 more) | <br>MODERATE |  |
|---------------|-------------------|--------------------------|----------------------|-------------|-------------|------|----------------------|------------------------|------------------------------|----------------------------------------------------|-------------------------------------------------------------------------------------------------|--|

Uptake of cervical cancer screening - RCTs - urban

|                                         |                   |                          |                      |             |             |      |                        |                        |                              |                                                   |                                                                                                 |  |
|-----------------------------------------|-------------------|--------------------------|----------------------|-------------|-------------|------|------------------------|------------------------|------------------------------|---------------------------------------------------|-------------------------------------------------------------------------------------------------|--|
| 13<br>3,4,5,6,9,10,11,12,13,19,20,27,30 | randomised trials | not serious <sup>a</sup> | serious <sup>b</sup> | not serious | not serious | none | 25345/78618<br>(32.2%) | 14607/36016<br>(40.6%) | RR 2.086<br>(1.537 to 2.831) | 440 more per 1,000<br>(from 218 more to 743 more) | <br>MODERATE |  |
|-----------------------------------------|-------------------|--------------------------|----------------------|-------------|-------------|------|------------------------|------------------------|------------------------------|---------------------------------------------------|-------------------------------------------------------------------------------------------------|--|

Uptake of cervical cancer screening - RCTs - rural

|                 |                   |                          |                      |             |             |      |                        |                        |                              |                                                   |                                                                                                 |  |
|-----------------|-------------------|--------------------------|----------------------|-------------|-------------|------|------------------------|------------------------|------------------------------|---------------------------------------------------|-------------------------------------------------------------------------------------------------|--|
| 4<br>1,14,29,30 | randomised trials | not serious <sup>a</sup> | serious <sup>b</sup> | not serious | not serious | none | 10272/12837<br>(80.0%) | 11498/14326<br>(80.3%) | RR 1.401<br>(1.135 to 1.730) | 322 more per 1,000<br>(from 108 more to 586 more) | <br>MODERATE |  |
|-----------------|-------------------|--------------------------|----------------------|-------------|-------------|------|------------------------|------------------------|------------------------------|---------------------------------------------------|-------------------------------------------------------------------------------------------------|--|

Uptake of cervical cancer screening - RCTs - age <50 years old

|                                       |                   |                          |                      |             |             |      |                        |                        |                              |                                                   |                                                                                                   |  |
|---------------------------------------|-------------------|--------------------------|----------------------|-------------|-------------|------|------------------------|------------------------|------------------------------|---------------------------------------------------|---------------------------------------------------------------------------------------------------|--|
| 12<br>4,5,6,9,10,13,15,17,18,22,25,26 | randomised trials | not serious <sup>a</sup> | serious <sup>b</sup> | not serious | not serious | none | 18038/51179<br>(35.2%) | 16955/56609<br>(30.0%) | RR 1.948<br>(1.609 to 2.360) | 284 more per 1,000<br>(from 182 more to 407 more) | <br>MODERATE |  |
|---------------------------------------|-------------------|--------------------------|----------------------|-------------|-------------|------|------------------------|------------------------|------------------------------|---------------------------------------------------|---------------------------------------------------------------------------------------------------|--|

Uptake of cervical cancer screening - RCTs - age 50+ years old

|                                    |                   |                          |                      |             |             |      |                       |                       |                              |                                                   |                                                                                                   |  |
|------------------------------------|-------------------|--------------------------|----------------------|-------------|-------------|------|-----------------------|-----------------------|------------------------------|---------------------------------------------------|---------------------------------------------------------------------------------------------------|--|
| 11<br>4,5,6,9,10,13,15,17,22,25,26 | randomised trials | not serious <sup>a</sup> | serious <sup>b</sup> | not serious | not serious | none | 6903/26341<br>(26.2%) | 7147/28418<br>(25.1%) | RR 2.246<br>(1.440 to 3.504) | 313 more per 1,000<br>(from 111 more to 630 more) | <br>MODERATE |  |
|------------------------------------|-------------------|--------------------------|----------------------|-------------|-------------|------|-----------------------|-----------------------|------------------------------|---------------------------------------------------|---------------------------------------------------------------------------------------------------|--|

| Certainty assessment |              |              |               |              |             |                      | No of patients    |                                                                 | Effect            |                   | Certainty | Importance |
|----------------------|--------------|--------------|---------------|--------------|-------------|----------------------|-------------------|-----------------------------------------------------------------|-------------------|-------------------|-----------|------------|
| No of studies        | Study design | Risk of bias | Inconsistency | Indirectness | Imprecision | Other considerations | HPV self-sampling | clinician-based sampling and cervical cancer screening services | Relative (95% CI) | Absolute (95% CI) |           |            |

Uptake of cervical cancer screening - RCTs - low socioeconomic status

|                          |                   |                          |                      |             |             |      |                     |                     |                           |                                                |                                                                                              |  |
|--------------------------|-------------------|--------------------------|----------------------|-------------|-------------|------|---------------------|---------------------|---------------------------|------------------------------------------------|----------------------------------------------------------------------------------------------|--|
| 4 <sup>13,14,25,30</sup> | randomised trials | not serious <sup>a</sup> | serious <sup>b</sup> | not serious | not serious | none | 10042/12859 (78.1%) | 11373/14853 (76.6%) | RR 1.622 (1.153 to 2.283) | 476 more per 1,000 (from 117 more to 982 more) |  MODERATE |  |
|--------------------------|-------------------|--------------------------|----------------------|-------------|-------------|------|---------------------|---------------------|---------------------------|------------------------------------------------|----------------------------------------------------------------------------------------------|--|

Uptake of cervical cancer screening - RCTs - high socioeconomic status

|                       |                   |                          |             |             |             |      |                  |                  |                           |                                               |                                                                                          |  |
|-----------------------|-------------------|--------------------------|-------------|-------------|-------------|------|------------------|------------------|---------------------------|-----------------------------------------------|------------------------------------------------------------------------------------------|--|
| 3 <sup>13,25,30</sup> | randomised trials | not serious <sup>a</sup> | not serious | not serious | not serious | none | 881/2400 (36.7%) | 347/1352 (25.7%) | RR 1.400 (1.147 to 1.709) | 103 more per 1,000 (from 38 more to 182 more) |  HIGH |  |
|-----------------------|-------------------|--------------------------|-------------|-------------|-------------|------|------------------|------------------|---------------------------|-----------------------------------------------|------------------------------------------------------------------------------------------|--|

Uptake of cervical cancer screening - RCTs - supervised

|                    |                   |                          |                      |             |             |      |                      |                     |                           |                                                |                                                                                              |  |
|--------------------|-------------------|--------------------------|----------------------|-------------|-------------|------|----------------------|---------------------|---------------------------|------------------------------------------------|----------------------------------------------------------------------------------------------|--|
| 2 <sup>14,24</sup> | randomised trials | not serious <sup>a</sup> | serious <sup>b</sup> | not serious | not serious | none | 50637/167026 (30.3%) | 12868/73229 (17.6%) | RR 2.214 (1.799 to 2.725) | 213 more per 1,000 (from 140 more to 303 more) |  MODERATE |  |
|--------------------|-------------------|--------------------------|----------------------|-------------|-------------|------|----------------------|---------------------|---------------------------|------------------------------------------------|----------------------------------------------------------------------------------------------|--|

Uptake of cervical cancer screening - RCTs - unsupervised

|                                                                                       |                   |                          |                      |             |                      |      |                   |                     |                           |                                                   |                                                                                           |  |
|---------------------------------------------------------------------------------------|-------------------|--------------------------|----------------------|-------------|----------------------|------|-------------------|---------------------|---------------------------|---------------------------------------------------|-------------------------------------------------------------------------------------------|--|
| 27 <sup>1,2,3,4,5,6,7,8,9,10,11,12,13,15,16,17,18,19,20,21,22,23,25,26,27,28,29</sup> | randomised trials | not serious <sup>a</sup> | serious <sup>b</sup> | not serious | serious <sup>d</sup> | none | 9362/9578 (97.7%) | 11111/12553 (88.5%) | RR 1.633 (0.739 to 3.608) | 560 more per 1,000 (from 231 fewer to 1,000 more) |  LOW |  |
|---------------------------------------------------------------------------------------|-------------------|--------------------------|----------------------|-------------|----------------------|------|-------------------|---------------------|---------------------------|---------------------------------------------------|-------------------------------------------------------------------------------------------|--|

Linkage to clinical assessment or treatment of cervical lesions following a positive result - RCTs

|                              |                   |                          |                      |             |             |      |                  |                 |                           |                                               |                                                                                                |  |
|------------------------------|-------------------|--------------------------|----------------------|-------------|-------------|------|------------------|-----------------|---------------------------|-----------------------------------------------|------------------------------------------------------------------------------------------------|--|
| 6 <sup>3,9,11,18,22,25</sup> | randomised trials | not serious <sup>f</sup> | serious <sup>b</sup> | not serious | not serious | none | 724/1162 (62.3%) | 245/573 (42.8%) | RR 1.118 (0.797 to 1.569) | 50 more per 1,000 (from 87 fewer to 243 more) |  MODERATE |  |
|------------------------------|-------------------|--------------------------|----------------------|-------------|-------------|------|------------------|-----------------|---------------------------|-----------------------------------------------|------------------------------------------------------------------------------------------------|--|

Frequency of cervical cancer screening - not reported

|   |   |   |   |   |   |   |   |   |   |   |   |   |
|---|---|---|---|---|---|---|---|---|---|---|---|---|
| - | - | - | - | - | - | - | - | - | - | - | - | - |
|---|---|---|---|---|---|---|---|---|---|---|---|---|

Social harms and adverse events - not reported

| Certainty assessment |              |              |               |              |             |                      | № of patients     |                                                                 | Effect            |                   | Certainty | Importance |
|----------------------|--------------|--------------|---------------|--------------|-------------|----------------------|-------------------|-----------------------------------------------------------------|-------------------|-------------------|-----------|------------|
| № of studies         | Study design | Risk of bias | Inconsistency | Indirectness | Imprecision | Other considerations | HPV self-sampling | clinician-based sampling and cervical cancer screening services | Relative (95% CI) | Absolute (95% CI) |           |            |
| -                    | -            | -            | -             | -            | -           | -                    | -                 | -                                                               | -                 | -                 | -         | -          |

CI: Confidence interval; RR: Risk ratio

## Explanations

- Not downgraded for risk of bias for the uptake of cervical cancer screening outcome. This outcome was measured by lab/medical records (# kits sent in for testing and # patients who got the Pap smear or VIA), not by self-report. Though blinding of participants/personnel nor blinding of outcome assessment occurred, blinding or not blinding should not have made a difference in uptake.
- Downgraded for substantial heterogeneity (I-squared > 80%).
- Single study
- Downgraded because the 95% confidence interval includes both appreciable benefit and harm.
- Publication bias suspected because the single included study for this self-sampling kit method of delivery had a small sample size (and small number of events).
- Not downgraded for lack of blinding because linkage to care was measured by lab/medical records, not by self-report.

## References

- Zehbe, I., Jackson, R., Wood, B., Weaver, B., Escott, N., Severini, A., Krajden, M., Bishop, L., Morrisseau, K., Ogilvie, G., Burchell, A. N., Little, J.. Community-randomised controlled trial embedded in the Anishinaabek Cervical Cancer Screening Study: human papillomavirus self-sampling versus Papanicolaou cytology. *BMJ Open*: Oct 8 2016.
- Wikstrom, I., Lindell, M., Sanner, K., Wilander, E.. Self-sampling and HPV testing or ordinary Pap-smear in women not regularly attending screening: a randomised study. *Br J Cancer*: 2011.
- Viviano, M., Catarino, R., Jeannot, E., Boulvain, M., Malinverno, M. U., Vassilakos, P., Petignat, P.. Self-sampling to improve cervical cancer screening coverage in Switzerland: a randomised controlled trial. *Br J Cancer*: May 23 2017.
- Virtanen, A., Nieminen, P., Luostarinen, T., Anttila, A.. Self-sample HPV Tests As an Intervention for Nonattendees of Cervical Cancer Screening in Finland: a Randomized Trial. *Cancer Epidemiol Biomarkers Prev*: Jun 1 2011.
- Szarewski, A., Cadman, L., Mesher, D., Austin, J., Ashdown-Barr, L., Edwards, R., Lyons, D., Walker, J., Christison, J., Frater, A., Waller, J.. HPV self-sampling as an alternative strategy in non-attenders for cervical screening - a randomised controlled trial. *Br J Cancer*: Mar 15 2011.
- Tranberg, M., Bech, B. H., Blaakaer, J., Jensen, J. S., Svanholm, H., Andersen, B.. Preventing cervical cancer using HPV self-sampling: direct mailing of test-kits increases screening participation more than timely opt-in procedures - a randomized controlled trial. *BMC Cancer*: Mar 9 2018.
- Sultana, F., English, D. R., Simpson, J. A., Drennan, K. T., Mullins, R., Brotherton, J. M., Wrede, C. D., Heley, S., Saville, M., Gertig, D. M.. Home-based HPV self-sampling improves participation by never-screened and under-screened women: Results from a large randomized trial (iPap) in Australia. *Int J Cancer*: Jul 15 2016.
- Sewali, B., Okuyemi, K. S., Askhir, A., Belinson, J., Vogel, R. I., Joseph, A., Ghebre, R. G.. Cervical cancer screening with clinic-based Pap test versus home HPV test among Somali immigrant women in Minnesota: a pilot randomized controlled trial. *Cancer Med*: Apr 2015.
- Sancho-Garnier, H., Tamalet, C., Halfon, P., Leandri, F. X., Le Retraite, L., Djoufelkit, K., Heid, P., Davies, P., Piana, L.. HPV self-sampling or the Pap-smear: a randomized study among cervical screening nonattenders from lower socioeconomic groups in France. *Int J Cancer*: Dec 1 2013.
- Piana, Lucien, Leandri, François-Xavier, Le Retraite, Laurence, Heid, Patrice, Tamalet, Catherine, Sancho-Garnier, Hélène. L'auto-prélèvement vaginal à domicile pour recherche de papilloma virus à haut risque. Campagne expérimentale du département des Bouches-du-Rhône. *Bull Cancer Radiother*: 2011/07/01/.
- Moses, E., Pedersen, H. N., Mitchell, S. M., Sekikubo, M., Mwesigwa, D., Singer, J., Biryabarema, C., Byamugisha, J. K., Money, D. M., Ogilvie, G. S.. Uptake of community-based, self-collected HPV testing vs. visual inspection with acetic acid for cervical cancer screening in Kampala, Uganda: preliminary results of a randomised controlled trial. *Trop Med Int Health*: Oct 2015.

12. Murphy, J., Mark, H., Anderson, J., Farley, J., Allen, J.. A Randomized Trial of Human Papillomavirus Self-Sampling as an Intervention to Promote Cervical Cancer Screening Among Women With HIV. *J Low Genit Tract Dis*; Apr 2016.
13. Modibbo, F., Iregbu, K. C., Okuma, J., Leeman, A., Kasius, A., de Koning, M., Quint, W., Adebamowo, C.. Randomized trial evaluating self-sampling for HPV DNA based tests for cervical cancer screening in Nigeria. *Infect Agent Cancer*; 2017.
14. Lazcano-Ponce, E., Lorincz, A. T., Cruz-Valdez, A., Salmeron, J., Uribe, P., Velasco-Mondragon, E., Nevarez, P. H., Acosta, R. D., Hernandez-Avila, M.. Self-collection of vaginal specimens for human papillomavirus testing in cervical cancer prevention (MARCH): a community-based randomised controlled trial. *Lancet*; 2011.
15. Kellen, E., Benoy, I., Vanden Broeck, D., Martens, P., Bogers, J. P., Haelens, A., Van Limbergen, E.. A randomized, controlled trial of two strategies of offering the home-based HPV self-sampling test to non- participants in the Flemish cervical cancer screening program. *Int J Cancer*; Aug 15 2018.
16. Ivanus, U., Jerman, T., Fokter, A. R., Takac, I., Prevodnik, V. K., Marcec, M., Gajsek, U. S., Pakiz, M., Koren, J., Celik, S. H., Kramberger, K. G., Klopčič, U., Kavalarič, R., Zatlner, S. S., Kuzmanov, B. G., Florjancic, M., Nolde, N., Novakovic, S., Poljak, M., Zakej, M. P.. Randomised trial of HPV self-sampling among non-attenders in the Slovenian cervical screening programme ZORA: comparing three different screening approaches. *Radiol Oncol*; Sep 14 2018.
17. Haguenoer, K., Sengchanh, S., Gaudy-Graffin, C., Boyard, J., Fontenay, R., Marret, H., Goudeau, A., Pigneaux de Laroche, N., Rusch, E., Giraudeau, B.. Vaginal self-sampling is a cost-effective way to increase participation in a cervical cancer screening programme: a randomised trial. *Br J Cancer*; 2014.
18. Gustavsson, I., Aarnio, R., Berggrund, M., Hedlund-Lindberg, J., Strand, A. S., Sanner, K., Wikstrom, I., Enroth, S., Olovsson, M., Gyllensten, U.. Randomised study shows that repeated self-sampling and HPV test has more than two-fold higher detection rate of women with CIN2+ histology than Pap smear cytology. *Br J Cancer*; Mar 20 2018.
19. Gok, M., van Kemenade, F. J., Heideman, D. A., Berkhof, J., Rozendaal, L., Spruyt, J. W., Belien, J. A., Babovic, M., Snijders, P. J., Meijer, C. J.. Experience with high-risk human papillomavirus testing on vaginal brush-based self-samples of non-attendees of the cervical screening program. *Int J Cancer*; Mar 1 2012.
20. Gok, M., Heideman, D. A., van Kemenade, F. J., Berkhof, J., Rozendaal, L., Spruyt, J. W., Voorhorst, F., Belien, J. A., Babovic, M., Snijders, P. J., Meijer, C. J.. HPV testing on self collected cervicovaginal lavage specimens as screening method for women who do not attend cervical screening: cohort study. *Bmj*; Mar 11 2010.
21. Giorgi Rossi, P., Marsili, L. M., Camilloni, L., Iossa, A., Lattanzi, A., Sani, C., Di Pierro, C., Grazzini, G., Angeloni, C., Capparucci, P., Pellegrini, A., Schiboni, M. L., Sperati, A., Confortini, M., Bellanova, C., D'Addetta, A., Mania, E., Visioli, C. B., Sereno, E., Carozzi, F., Self-Sampling Study Working Group. The effect of self-sampled HPV testing on participation to cervical cancer screening in Italy: a randomised controlled trial (ISRCTN96071600). *Br J Cancer*; Jan 18 2011.
22. Giorgi Rossi, P., Fortunato, C., Barbarino, P., Boveri, S., Caroli, S., Del Mistro, A., Ferro, A., Giammaria, C., Manfredi, M., Moretto, T., Pasquini, A., Sideri, M., Tufi, M. C., Cogo, C., Altobelli, E.. Self-sampling to increase participation in cervical cancer screening: an RCT comparing home mailing, distribution in pharmacies, and recall letter. *Br J Cancer*; Feb 17 2015.
23. Darlin, L., Borgfeldt, C., Forslund, O., Henic, E., Hortlund, M., Dillner, J., Kannisto, P.. Comparison of use of vaginal HPV self-sampling and offering flexible appointments as strategies to reach long-term non-attending women in organized cervical screening. *J Clin Virol*; Sep 2013.
24. Carrasquillo, O., Seay, J., Amofah, A., Pierre, L., Alonzo, Y., McCann, S., Gonzalez, M., Trevil, D., Koru-Sengul, T., Kobetz, E.. HPV Self-Sampling for Cervical Cancer Screening Among Ethnic Minority Women in South Florida: a Randomized Trial. *J Gen Intern Med*; Jul 2018.
25. Cadman, L., Wilkes, S., Mansour, D., Austin, J., Ashdown-Barr, L., Edwards, R., Kleeman, M., Szarewski, A.. A randomized controlled trial in non-responders from Newcastle upon Tyne invited to return a self-sample for Human Papillomavirus testing versus repeat invitation for cervical screening. *J Med Screen*; Mar 2015.
26. Broberg, G., Gyrd-Hansen, D., Jonasson, J. M., Ryd, M. L., Hollenman, M., Milsom, I., Strander, B.. Increasing participation in cervical cancer screening: Offering a HPV self-test to long-term non-attendees as part of RACOMIP, a Swedish randomized controlled trial. *Int J Cancer*; May 1 2014.
27. Bais, A. G., van Kemenade, F. J., Berkhof, J., Verheijen, R. H., Snijders, P. J., Voorhorst, F., Babovic, M., van Ballegooijen, M., Helmerhorst, T. J., Meijer, C. J.. Human papillomavirus testing on self-sampled cervicovaginal brushes: an effective alternative to protect nonresponders in cervical screening programs. *Int J Cancer*; Apr 1 2007.
28. Arrossi, S., Thouyaret, L., Herrero, R., Campanera, A., Magdaleno, A., Cuberli, M., Barletta, P., Laudi, R., Orellana, L., Team, EMA.Study. Effect of self-collection of HPV DNA offered by community health workers at home visits on uptake of screening for cervical cancer (the EMA study): a population-based cluster-randomised trial. *Lancet Glob Health*; Feb 2015.
29. Racey, C. S., Gesink, D. C., Burchell, A. N., Trivers, S., Wong, T., Rebbapragada, A.. Randomized intervention of self-collected sampling for human papillomavirus testing in under-screened rural women: uptake of screening and acceptability. *J Womens Health*; 2016.
30. Tranberg, M., Bech, B. H., Blaakaer, J., Jensen, J. S., Svanholm, H., Andersen, B.. HPV self-sampling in cervical cancer screening: the effect of different invitation strategies in various socioeconomic groups - a randomized controlled trial. *Clin Epidemiol*; 2018.
